# Supplementary material for: Structure of a Rpd3/HDAC holoenzyme complex bound to the nucleosome
Source: Research Square preprint supplement (doi:10.21203/rs.3.rs-2667786/v1), 2023-03-16
Supplement: Supplementary file 1 [file d452bd61315c42227886eb02.pdf]

## **Purification of endogenous Rpd3S complex**

The Rpd3S complex was purified from a yeast strain containing a 2xFlag tag at the C terminus of Rco1 subunit. The tagged yeast strain was grown in 10 L YPD medium overnight at 30°C. Cells were collected by centrifugation and resuspended in lysis buffer (50 mM Tris pH 7.6, 300 mM ammonium sulfate, 1 mM EDTA, 10 uM ZnCl<sub>2</sub>, 10% glycerol and protease inhibitor cocktail). The cell suspension was frozen in liquid nitrogen and milled to powder using a cryogenic grinder (Spex sample prep 6875). The powder was thawed at 4°C and centrifuged at 16,000 g for 30 min to remove cell debris. The supernatant was centrifuged in a Beckman Optima XE-90 ultracentrifuge with a Beckman Type 45 Ti rotor at 40,000 rpm for 2 hours at 4°C. The clarified supernatant was selectively precipitated in 30%-55% ammonium sulfate and resuspended in binding buffer (25 mM Tris pH 7.6, 100 mM ammonium sulfate, 1 mM EDTA, 10 uM ZnCl<sub>2</sub>, 10% glycerol and protease inhibitor cocktail). For the affinity purification, 0.5 ml Anti-FLAG M2 affinity beads (Sigma) were incubated with the supernatant at 4°C for 2 hours. The beads were next washed and resuspended in 1ml elution buffer (25 mM HEPES pH 7.6, 100 mM ammonium sulfate, 1 mM EDTA, 10% glycerol). Protein elution using 10 mM 3xFLAG peptide (Sigma) was performed at 4°C for 3 hours with gentle shaking. The eluate was concentrated and loaded onto a Superose 6 10/300 GL column (GE Healthcare Life Sciences) for further purification with SEC buffer (25 mM HEPES pH 7.6, 100 mM NaCl, 1 mM EDTA, 10% glycerol). The peak fractions containing the Rpd3S complex were combined and aliquoted, flash frozen in liquid nitrogen and stored at -80°C. For each purification step, the Rpd3S complex was monitored with purity and structural integrity by SDS-PAGE and EM examination.

## **Preparation of histone H3 modified with Kc36me3**

To generate the histone H3 with Kc36 trimethylation, mutations (K36C, C110A) were introduced into the H3 sequence by site-directed mutagenesis. The cysteine was alkylated to create *N*-methylated aminoethylcysteine residues, an analog of methyl-lysine, as previously described<sup>1</sup>. Briefly, 10 mg freeze-dried histones were dissolved in alkylation buffer (1 M HEPES pH 7.8, 4 M guanadinium chloride, 10 mM D/L-methionine) and reduced with DTT at 37°C for 1 hour. 100 mg (2-bromoethyl) trimethylammonium bromide (Sigma) was added and incubated at 50°C for 5 hours with occasional mixing.

The reactions were quenched with 5 mM  $\beta$ -mercaptoethanol and dialyzed to 3 mM  $\beta$ -mercaptoethanol/H<sub>2</sub>O. The modified histone H3 was aliquoted, lyophilized, and stored at -80°C. The appropriate trimethylation was confirmed by western blotting using H3K36me3 antibody (Abcam: ab9050).

### **Preparation of mononucleosome with 216 bp DNA**

*Xenopus laevis* histones H2A, H2B, H3-K36C/C100A and H4 were expressed respectively in *E. coli* BL21(DE3) as previously described<sup>2,3</sup> with modifications. The histones were purified from the inclusion body using SP sepharose resin under denaturing condition, further purified using a YMC-Pack PROTEIN-RP column with HPLC (Waters: 2535q) and lyophilized. To prepare the octamer, histones H2A, H2B, H3-K36C/C100A and H4 were mixed in an equimolar ratio and dialyzed against the refolding buffer (10 mM Tris pH 7.5, 2 M NaCl, 1 mM EDTA, 5 mM  $\beta$ -mercaptoethanol). The octamer was purified by loading the mixture onto a Superdex 200 increase 10/300 GL column (GE Healthcare Life Sciences) with refolding buffer.

The 216 bp DNA fragment containing a linker DNA and a nucleosome positioning sequence (Widom 601)<sup>4</sup> was generated by PCR. The PCR product was further purified by ion-exchange chromatography (Mono Q 5/50 GL, GE Healthcare Life Sciences) followed by isopropanol precipitation. The precipitated DNA pellet was dissolved in water, aliquoted, and stored at -20°C.

The sequence of 216 bp DNA with Widom 601 DNA underlined is as follows:

5'-

ACCATCGTCAGTATTGACTGCAGACCTGAAGCTTGATATCGAATTCGCGTGTC  
GCCCTTACTGGCCGCCCTGGAGAATCCCGGTGCCGAGGCCGCTCAATTGGTC  
GTAGACAGCTCTAGCACCGCTTAAACGCACGTACGCGCTGTCCCCCGCGTTTT  
AACCGCCAAGGGGATTACTCCCTAGTCTCCAGGCACGTGTCAGATATATACA  
TCCTGT-3'

Mononucleosome reconstitution was performed according to previously published protocols<sup>5</sup> by salt-dialysis method, and purified by non-denaturing electrophoresis using a Prep Cell apparatus (Bio-Rad). The resulting nucleosome with H3Kc36me3 was concentrated to approximately 1 mg/ml and stored on ice until used.

### **Electrophoretic mobility shift assay**

The Rpd3S-nucleosome complex was detected by electrophoresis on a 6% Native-PAGE gel in 0.2× TBE buffer at a constant voltage of 100 V for 1 hour. The gel was incubated for 10 min in TS-GelRed (Tsingke Biotechnology) containing NaCl buffer and visualized using an Imaging System (Tanon-2500).

### **HDAC activity assay**

To measure the histone deacetylation activity of purified Rpd3S complex, the reaction was performed, as previously described<sup>6</sup>, in a buffer containing 25 mM Tris, 100 mM NaCl, 2 mM ZnCl<sub>2</sub>, 1% glycerol, 100 μM fluorogenic substrate Boc-Lys(Ac)-AMC, pH 7.5. Reactions were initiated by adding 42 nM Rpd3S with and without 1 μM TSA and kept at room temperature for 1 hour. The reaction was stopped by the addition of 5 mg/ml trypsin and maintained for 1 hour at 37°C. The fluorescence intensities were measured with excitation at 350 nm and emission at 440 nm, using a multiscan spectrum (SpectraMax iD5). For the HDAC assay in the presence of 100 μM nucleosome, Rpd3S and 28 nM nucleosome were premixed and incubated on ice for 1 hour. Subsequent processes were performed as described above. The reaction was performed in triplicate, and the SD of the raw data is reported.

### **Cryo-EM sample preparation of Rpd3S-nucleosome complex**

The Rpd3S was incubated with excess H3Kc36me3-modified nucleosome for 1 hour on ice. Excess nucleosome was removed by a Superose 6 10/300 GL column equilibrated in EM buffer (25 mM HEPES pH 7.6, 100 mM NaCl, 1 mM EDTA, 1 mM DTT, 2% glycerol). The fractions corresponding to Rpd3S-nucleosome complex were assessed by 6% Native-PAGE and SDS-PAGE, then collected and concentrated for cryo-EM grid preparation.

### **Cryo-EM grid preparation and data collection**

For the Rpd3S complex, purified protein was diluted to approximately 50 μg/ml with the buffer (25 mM HEPES pH 7.6, 100 mM NaCl, 1 mM EDTA, 10% glycerol) and 3 μl of aliquots were applied onto freshly glow-discharged lacey carbon grids coated with a second layer of 3nm thick carbon film (TED PELLA). Samples were incubated on grids

for 20 s, blotted for 3.5 s and plunged frozen in liquid ethane. Cryo-EM grids were prepared with an EMGP2 (Leica company) set to 8°C and 95% humidity. The data was acquired on a Titan Krios electron microscope (FEI) at 300 keV equipped with a K2 summit direct electron detector (Gatan). A total of 4,724 movies were automatically recorded using SerialEM software at a nominal magnification of 18,000x, yielding a pixel size of 1.35 Å in counting mode, with defocus values ranging from -2.5 to -3.5 µm. The data was recorded with a total dose of 59 electrons per Å<sup>2</sup>, recording 36 frames. For the Rpd3S-nucleosome complex, aliquots of 3 µl concentrated sample were loaded onto glow-discharged Quantifoil R2/1 Au 400 grids. After incubation for 20 s, the grids were blotted for 4 s and plunged frozen in liquid ethane. Grids were transferred to a Titan Krios transmission electron microscope (Thermo fisher) operating at 300 kV equipped with a Gatan Gif Quantum energy filter. Cryo-EM data was collected with EPU software through a Gatan K3 direct electron detector in counting mode at 81,000 x nominal magnification, resulting in a physical pixel size corresponding to 1.07 Å, with a defocus range of -1.8 to -2.8 µm. Exposure of 3.8 s was dose-fractionated into 32 moves frames, leading to a total accumulated dose of 53 electrons per Å<sup>2</sup> on the specimen. A total of 2,818 movies were saved as unprocessed Tiff files for analysis.

## **Image processing**

The Rpd3S dataset:

Individual movie frames were aligned using MotionCor2<sup>7</sup>. CTF parameters were estimated using CtfFind4<sup>8</sup>. Particles were picked in Gautomatch (by K.Z., under development) using 2D averages obtained from negative staining data. Subsequent image processing was carried out in RELION-4.0-beta-2<sup>9</sup> and cryoSPARC v3.3.2<sup>10</sup>. A total of 876,212 particles were extracted by four-times downscaling resulting in the pixel size of 5.4 with a box size of 84 x 84 pixels. Multiple rounds ab-initio reconstruction and heterogeneous refinement were run to get the best particles. The unbinned 73,857 particles were re-extracted and divided into three classes using heterogeneous refinement in cryoSPARC. Then the particles (24,648 particles; 25,950 particles; 23,259 particles) of these three conformations were reconstructed using non-uniform refinement, respectively. The final models were refined to an overall resolution of 9.84 Å, 8.68 Å and 8.82 Å.

1  
2 The Rpd3S-nucleosome dataset:

3 The movies were imported into RELION-4.0-beta-2, and the whole-frame motion  
4 correction was carried out by the RELION's own implementation with dose weighting.  
5 Contrast transfer function (CTF) parameters were estimated using CTFFIND4.  
6 Subsequently micrographs were rejected with extreme defocus values, too much  
7 contamination or aggregation. Two particle subsets were initially picked using the  
8 Gautomatch with the templates of Rpd3S and nucleosome, respectively, from the  
9 remaining good 2,635 micrographs. The two subsets were extracted by four-times  
10 downscaling resulting in the pixel size of 4.28 with a box size of 84 x 84 pixels, and  
11 combined. The particles within the minimum inter-particle distance 30 Å were removed  
12 leaving only one. Multiple rounds of reference-free 2D classification were run to remove  
13 bad particles, and the following processes were performed using cryoSPARC v3.3.2.  
14 After Ab-Initio reconstruction and heterogeneous refinement, a set of 130,804 particles  
15 was re-extracted with the pixel size of 1.07. Further 3D classification was performed to  
16 get homogeneous nucleosome-bound particles. The model was refined to an overall  
17 resolution of 4.06 Å with 68,446 particles. To further improve the final resolution, a  
18 series of 2D projections of the 4.06 Å map were used as template to re-pick particles  
19 using Gautomatch. Subsequent processes were similarly performed as described above. A  
20 final set of 107,252 Rpd3S-nucleosome complex particles was selected to perform a final  
21 3D refinement, leading to a map with resolution at 3.72 Å. The same particles were  
22 further used for particle subtraction, the Rpd3S core complex and nucleosome-Eaf3  
23 complex, and further local refinement was carried out to obtain 3.37 Å and 3.58 Å maps.  
24 The resolution values reported for all reconstructions were based on the gold-standard  
25 Fourier shell correlation (FSC) 0.143 criterion.

## 26 27 **Model building and refinement**

28 A nucleosome structure (PDB 6S01) <sup>11</sup> and the available structures of Rpd3S from  
29 AlphaFold protein structure database <sup>12,13</sup> were fitted into the refined 3D reconstruction  
30 map using UCSF Chimera <sup>14</sup> and then manually rebuilt in Coot <sup>15</sup>. The remainder of the  
31 molecules, including Rco1 N-ter, Rpd3 C-ter and linker DNA, were manually built based  
32 on high-resolution maps in Coot. The model was subject to real-space refinement in

Phenix 1.18<sup>16</sup>. Structural analysis was performed in Coot, and figures were prepared using UCSF Chimera and ChimeraX<sup>17</sup>.

## Reference:

- 1 Simon, M. D. *et al.* The site-specific installation of methyl-lysine analogs into recombinant histones. *Cell* **128**, 1003-1012 (2007).  
<https://doi.org:10.1016/j.cell.2006.12.041>
- 2 Zhou, B. R. *et al.* Atomic resolution cryo-EM structure of a native-like CENP-A nucleosome aided by an antibody fragment. *Nat Commun* **10**, 2301 (2019).  
<https://doi.org:10.1038/s41467-019-10247-4>
- 3 Dyer, P. N. *et al.* Reconstitution of nucleosome core particles from recombinant histones and DNA. *Methods Enzymol* **375**, 23-44 (2004). [https://doi.org:10.1016/s0076-6879\(03\)75002-2](https://doi.org:10.1016/s0076-6879(03)75002-2)
- 4 Lowary, P. T. & Widom, J. New DNA sequence rules for high affinity binding to histone octamer and sequence-directed nucleosome positioning. *Journal of Molecular Biology* **276**, 19-42 (1998). <https://doi.org:DOI 10.1006/jmbi.1997.1494>
- 5 Luger, K., Rechsteiner, T. J. & Richmond, T. J. Preparation of nucleosome core particle from recombinant histones. *Methods Enzymol* **304**, 3-19 (1999).  
[https://doi.org:10.1016/s0076-6879\(99\)04003-3](https://doi.org:10.1016/s0076-6879(99)04003-3)
- 6 Adams, M. K., Banks, C. A. S., Miah, S., Killer, M. & Washburn, M. P. Purification and enzymatic assay of class I histone deacetylase enzymes. *Method Enzymol* **626**, 23-40 (2019). <https://doi.org:10.1016/bs.mie.2019.07.014>
- 7 Zheng, S. Q. *et al.* MotionCor2: anisotropic correction of beam-induced motion for improved cryo-electron microscopy. *Nat Methods* **14**, 331-332 (2017).  
<https://doi.org:10.1038/nmeth.4193>
- 8 Rohou, A. & Grigorieff, N. CTFFIND4: Fast and accurate defocus estimation from electron micrographs. *J Struct Biol* **192**, 216-221 (2015).  
<https://doi.org:10.1016/j.jsb.2015.08.008>
- 9 Scheres, S. H. RELION: implementation of a Bayesian approach to cryo-EM structure determination. *Journal of structural biology* **180**, 519-530 (2012).  
<https://doi.org:10.1016/j.jsb.2012.09.006>
- 10 Punjani, A., Rubinstein, J. L., Fleet, D. J. & Brubaker, M. A. cryoSPARC: algorithms for rapid unsupervised cryo-EM structure determination. *Nat Methods* **14**, 290-296 (2017).  
<https://doi.org:10.1038/nmeth.4169>
- 11 Wang, H. B., Farnung, L., Dienemann, C. & Cramer, P. Structure of H3K36-methylated nucleosome-PWWP complex reveals multivalent cross-gyre binding. *Nat Struct Mol Biol* **27**, 8-+ (2020). <https://doi.org:10.1038/s41594-019-0345-4>
- 12 Jumper, J. *et al.* Highly accurate protein structure prediction with AlphaFold. *Nature* **596**, 583-+ (2021). <https://doi.org:10.1038/s41586-021-03819-2>
- 13 Varadi, M. *et al.* AlphaFold Protein Structure Database: massively expanding the structural coverage of protein-sequence space with high-accuracy models. *Nucleic Acids Research* **50**, D439-D444 (2022). <https://doi.org:10.1093/nar/gkab1061>

1 14 Pettersen, E. F. *et al.* UCSF Chimera--a visualization system for exploratory research and  
2 analysis. *J Comput Chem* **25**, 1605-1612 (2004). <https://doi.org:10.1002/jcc.20084>  
3 15 Emsley, P. & Cowtan, K. Coot: model-building tools for molecular graphics. *Acta*  
4 *Crystallogr D Biol Crystallogr* **60**, 2126-2132 (2004).  
5 <https://doi.org:10.1107/S0907444904019158>  
6 16 Adams, P. D. *et al.* PHENIX: a comprehensive Python-based system for macromolecular  
7 structure solution. *Acta Crystallogr D Biol Crystallogr* **66**, 213-221 (2010).  
8 <https://doi.org:10.1107/S0907444909052925>  
9 17 Goddard, T. D. *et al.* UCSF ChimeraX: Meeting modern challenges in visualization and  
10 analysis. *Protein Sci* **27**, 14-25 (2018). <https://doi.org:10.1002/pro.3235>

11

12

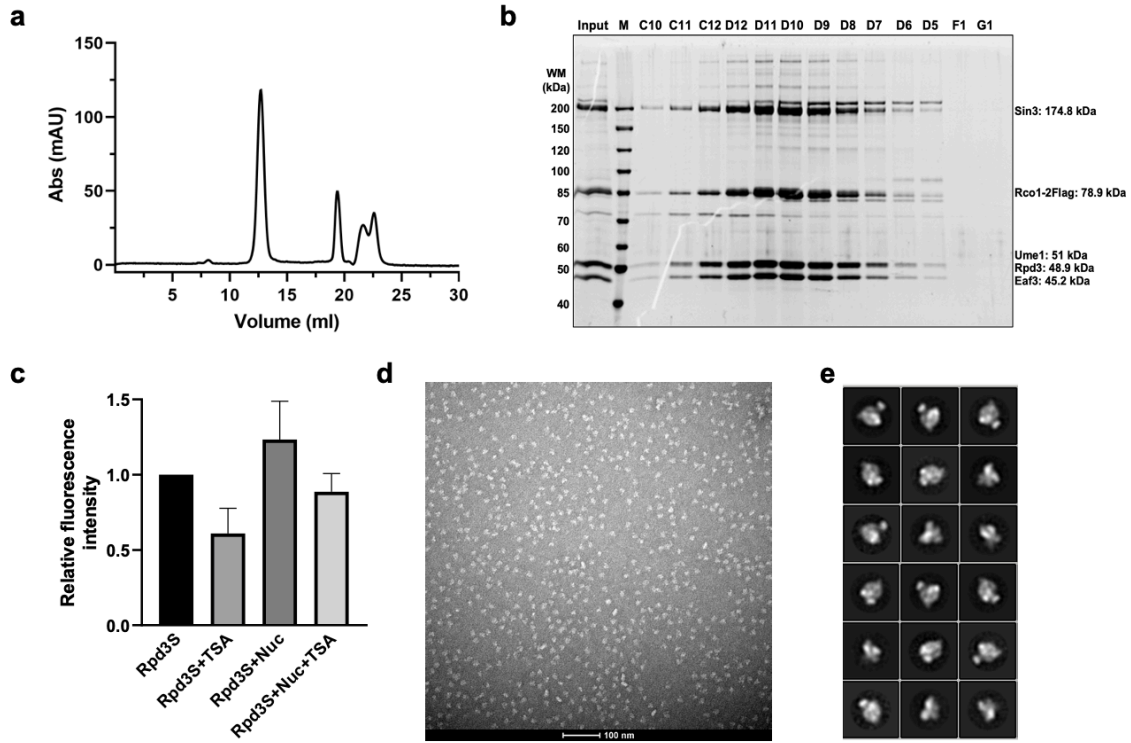

**Extended Data Figure 1 | Purification and preliminary EM analysis of the Rpd3S. a,** Size-exclusion chromatogram of the endogenously purified Rpd3S from *S. cerevisiae*, using a Superose 6 10/300 GL gel filtration column and monitoring absorption at 280 nm. **b,** SDS-PAGE analysis of the purified Rpd3S (the first peak). **c,** *In vitro* deacetylase activity of the purified Rpd3S complex. **d,** A typical electron micrograph showing the appearance of the negative stained Rpd3S sample. **e,** A typical 2D class average of Rpd3S preserved under negative stain.



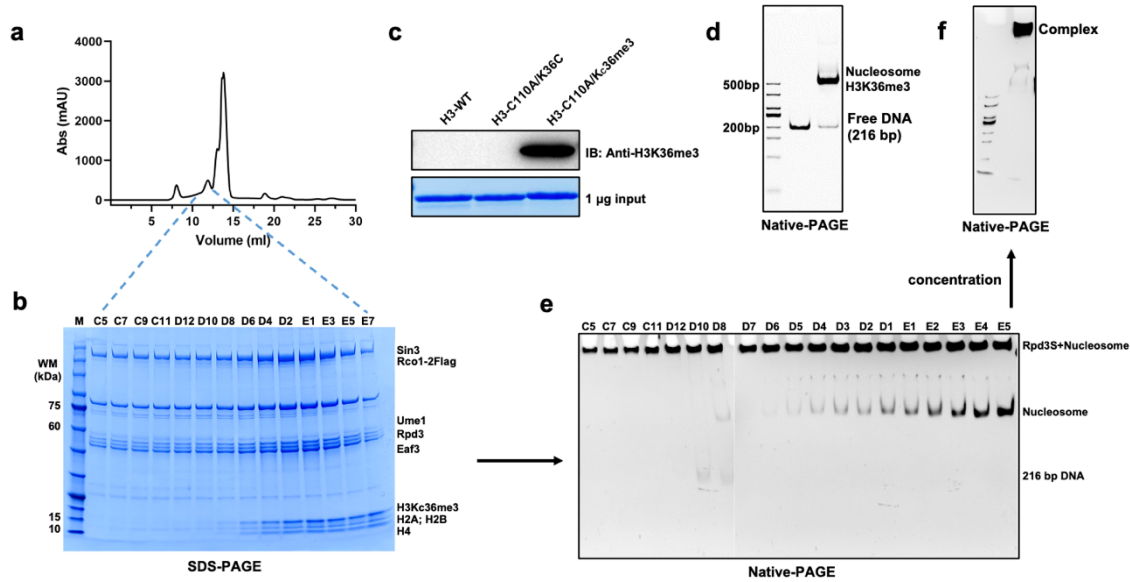

**Extended Data Figure 2 | Rpd3S-nucleosome complex assembly.** **a**, Purification of the Rpd3S-nucleosome complex Superose 6 10/300 GL column. **b**, SDS-PAGE analysis of the Rpd3S-nucleosome complex peak (~12 ml). **c**, The identification of the H3Kc36me3-modified H3 was performed by Western blotting. **d**, The reconstituted mononucleosome with 216 bp DNA was assessed by Native-PAGE. **e**, The Rpd3S-nucleosome complex fractions were assessed by Native-PAGE and the fractions from C5 to E5 were selected for cryo-EM analysis. **f**, The concentrated Rpd3S-nucleosome complex was assessed by Native-PAGE before cryo-EM grids preparation.

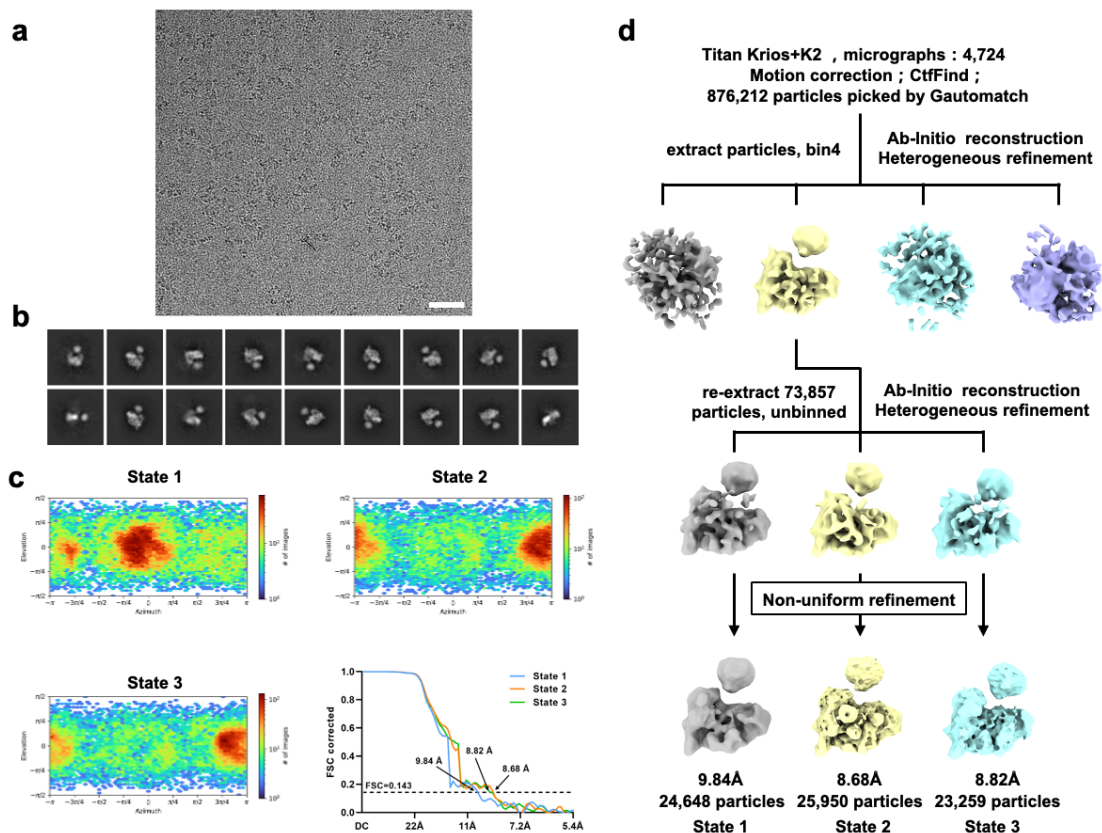

**Extended Data Figure 3 | Cryo-EM data processing of *S. cerevisiae* Rpd3S.** **a**, A typical micrograph of the Rpd3S preserved in vitrified ice. Scale bar, 50 nm. **b**, Typical 2D class averages obtained after reference-free alignment and classification of images of Rpd3S particles. **c**, Heat maps showing particle orientation distribution and Gold-standard FSC curves of the reconstructed Rpd3S three conformations: state 1 map 9.84 Å, state 2 map 8.86 Å and state 3 map 8.82 Å (FSC = 0.143). **d**, Flow chart of cryo-EM data processing.

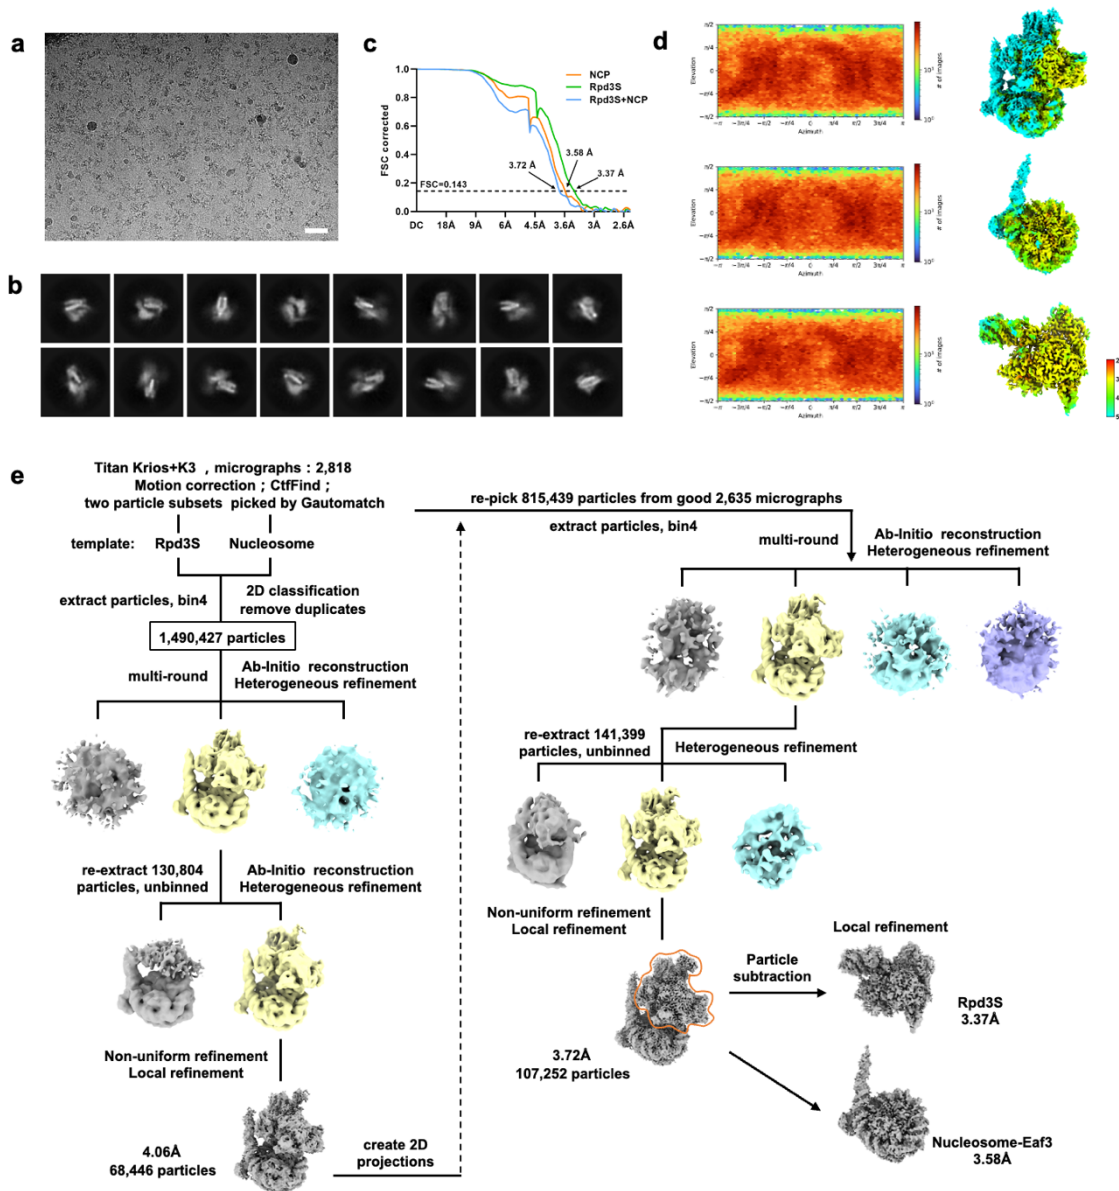

**Extended Data Figure 4 | Rpd3S-nucleosome complex cryo-EM reconstruction.** **a**, Representative micrograph of the dataset used to determine the Rpd3S-nucleosome complex structure. Scale bar, 50 nm. **b**, A typical reference-free 2D classes averages of Rpd3S-nucleosome. **c**, FSC curve for the cryo-EM density map according to the gold-standard criterion. The final resolution of Rpd3S-nucleosome is 3.72 Å, Rpd3S core 3.37 Å, and nucleosome-Eaf3 3.58 Å. **d**, Angular distributions of particles used in the final 3D reconstruction (left) and the local resolution of the corresponding cryo-EM map (right), Rpd3S-nucleosome (top), nucleosome-Eaf3 (middle), Rpd3S core (bottom). **e**, Image processing scheme. Particles were picked using different templates to achieve higher map resolution, also performed particle subtraction and local refinement.

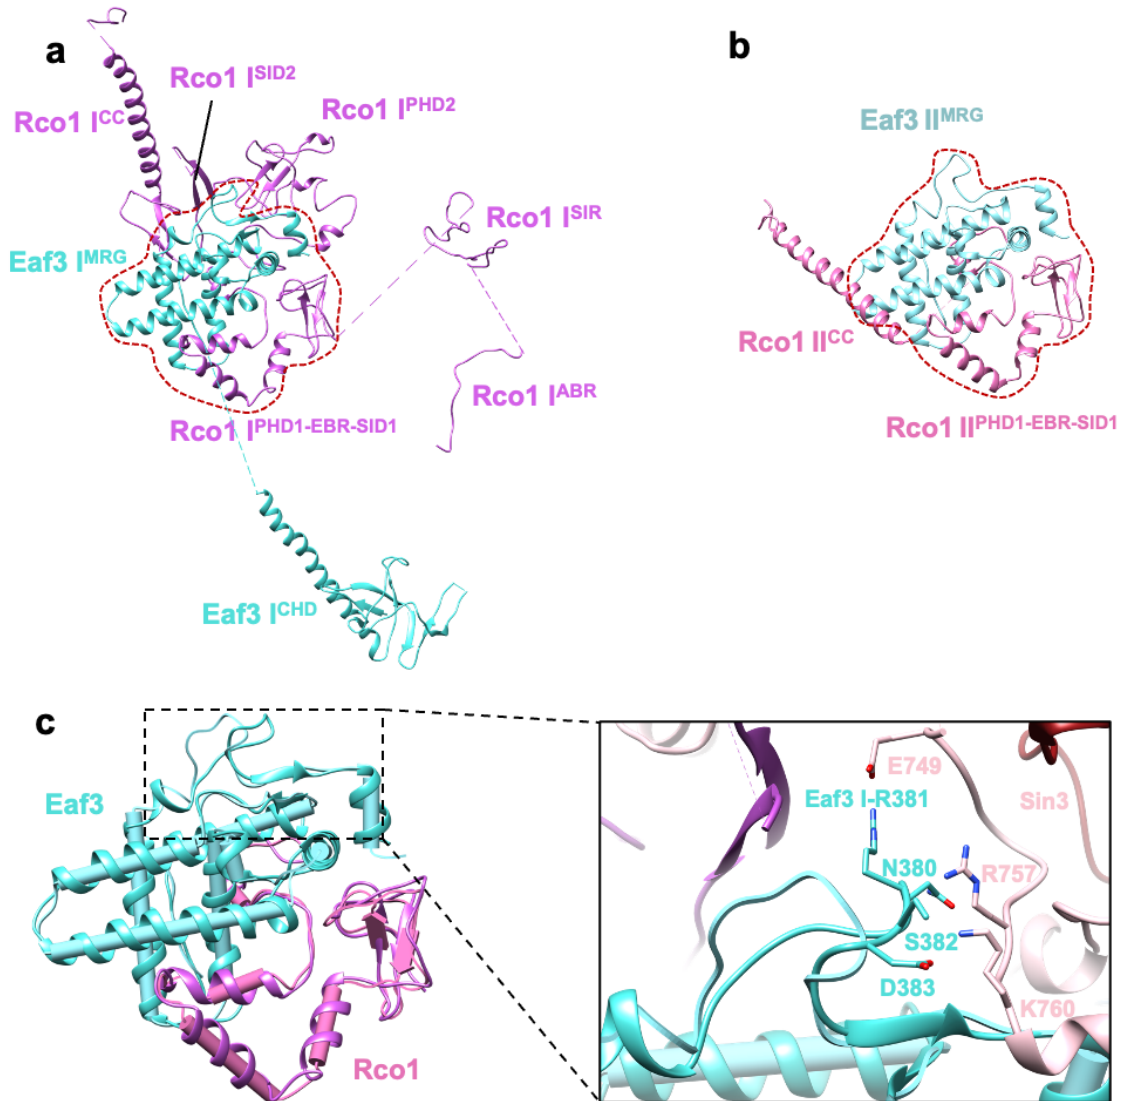

**Extended Data Figure 5 | The comparison between Eaf3-Rco1 two copies in Rpd3S-nucleosome complex. a-b**, Eaf3 MRG domain and Rco1 PHD-EBR-SID1 domain of copy 1 were highlighted by the red dotted line, the same view of Eaf3-Rco1 copy 2 shown in **b**. **c**, Eaf3-Rco1 two copies were merged (left) and the close-up view of the significant difference in the loop of Eaf3 (375-383 residues) shown (right).

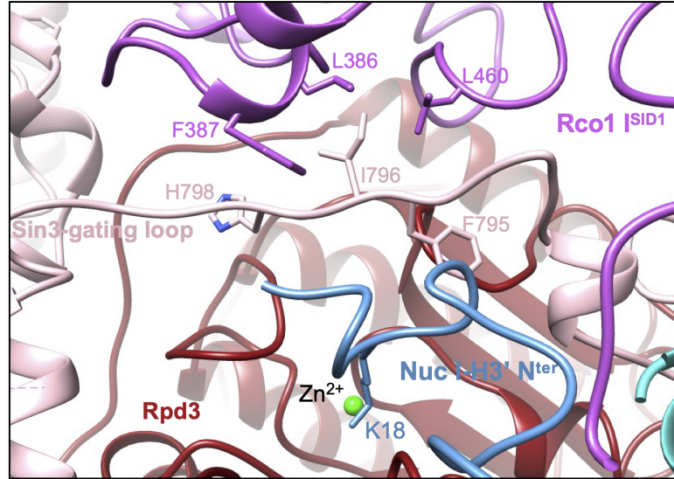

**Extended Data Figure 6 | The close-up view of the histone H3 substrate catalytic site.** The side chain of H3K18 deposited into the Rpd3 HDAC active core is shown, and the side chain of residues involved in the interface between Rco1-SID1 and Sin3-gating loop is denoted.

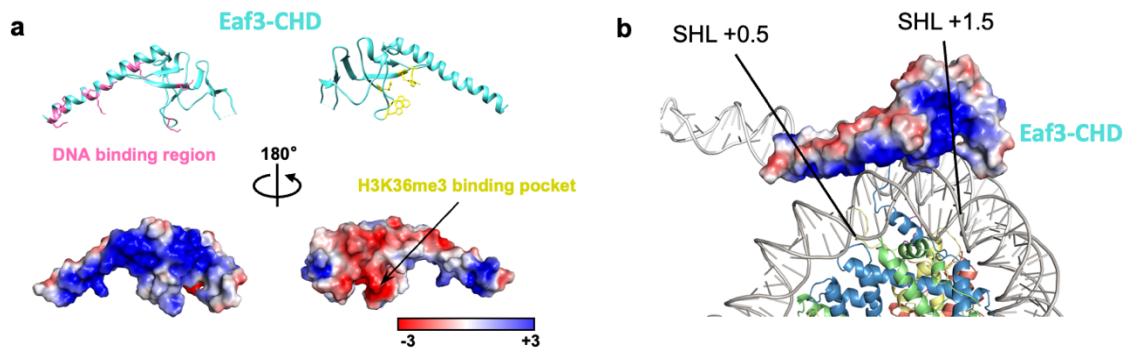

**Extended Data Figure 7 | Binding of Eaf3 CHD domain to H3K36me3 and nucleosome DNA.** **a**, Electrostatic surface of the Eaf3 CHD domain calculated using the APBS tool (bottom). The positively charged surface involved in DNA interaction and the residues are colored in pink (top left); the residues involved in H3K36me3 recognition are colored in yellow (top right). **b**, Details of DNA interactions. SHLs are denoted.

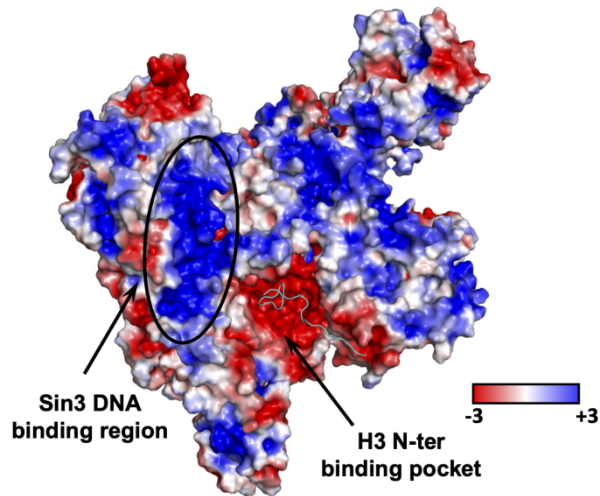

**Extended Data Figure 8 | Electrostatic analysis of the Sin3 DNA binding region and the substrate binding pocket.** Electrostatic surface of the Rpd3S core complex calculated using the APBS tool in a range of  $-3 \text{ kT e}^{-1}$  to  $+3 \text{ kT e}^{-1}$ . The positively charged surface is consistent with the DNA binding region of Sin3, and the catalytic substrate H3 N-ter (shown in ribbon) deposited in the negatively charged pocket.



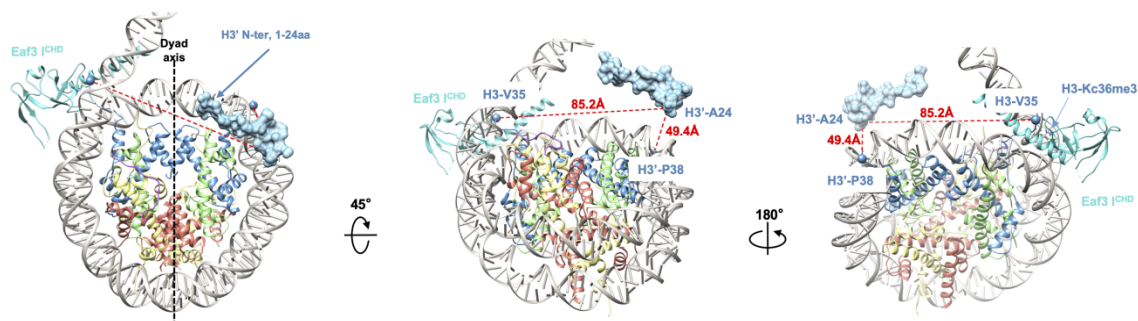

**Extended Data Figure 9 | The histone H3 tail deposited in the catalytic pocket is different from the H3 bound by Eaf3.** The histone H3 N-ter (1-24 residues) in catalytic site are shown as surface. The distances of the H3 A24 residue to the two H3 tails are shown in red with different views.



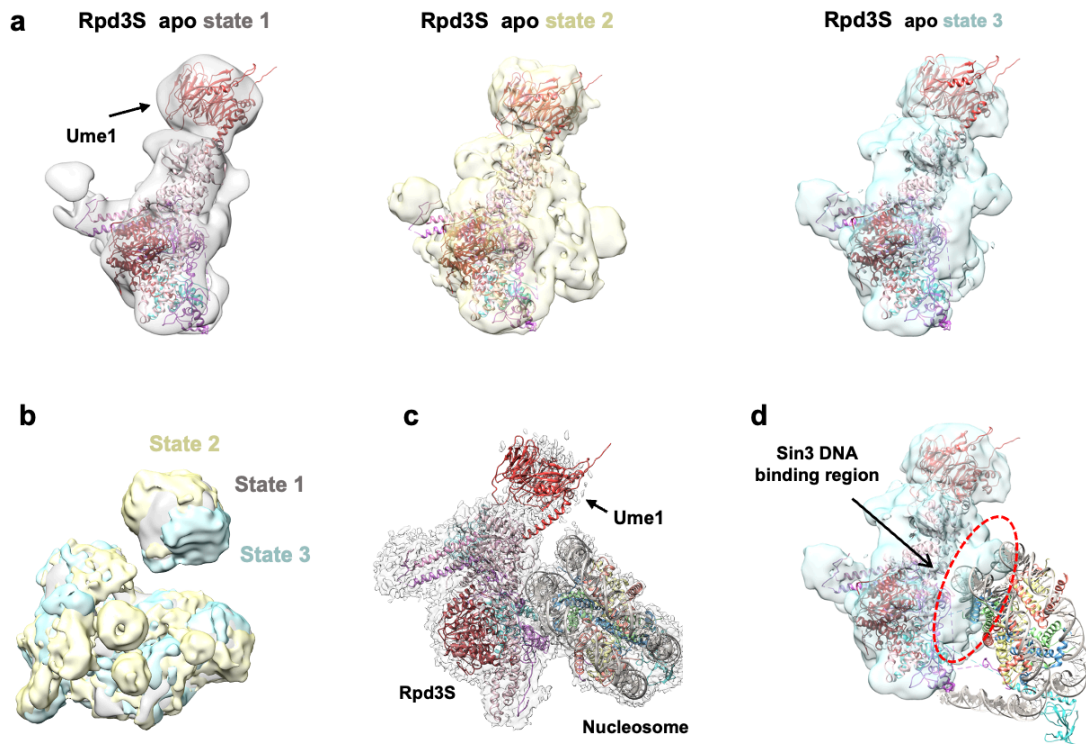

**Extended Data Figure 10 | The potential location of Ume1 in Rpd3S holoenzyme. a,** Ume1 structure from AlphaFold protein structure database is denoted and fitted into the Rpd3S apo states maps. **b,** The comparison between the Rpd3S apo states (shown in different colors). **c,** Ume1 fitted in the disordered region of Rpd3S-nucleosome complex. **d,** Sin3 DNA binding region is occupied by additional density (highlighted by the red dotted line) in Rpd3S apo state.

1 **Extended Data Table. Statistics of 3D reconstruction and model refinement**  
2

|                                                        | NCP-Eaf3<br>(PDB 8IHM)<br>(EMDB-<br>35449) | Rpd3S core<br>(PDB 8IHN)<br>(EMDB-<br>35450) | Rpd3S-NCP<br>(PDB 8IHT)<br>(EMDB-<br>35455) | Rpd3S apo<br>state 1<br>(EMDB-<br>35456) | Rpd3S apo<br>state 2<br>(EMDB-<br>35457) | Rpd3S apo<br>state 3<br>(EMDB-<br>35458) |
|--------------------------------------------------------|--------------------------------------------|----------------------------------------------|---------------------------------------------|------------------------------------------|------------------------------------------|------------------------------------------|
| <b>Data collection and processing</b>                  |                                            |                                              |                                             |                                          |                                          |                                          |
| Microscope                                             | Krios G3                                   | Krios G3                                     | Krios G3                                    | Krios G3                                 | Krios G3                                 | Krios G3                                 |
| Camera                                                 | K3                                         | K3                                           | K3                                          | K2                                       | K2                                       | K2                                       |
| Voltage (kV)                                           | 300                                        | 300                                          | 300                                         | 300                                      | 300                                      | 300                                      |
| Magnification                                          | 81,000                                     | 81,000                                       | 81,000                                      | 18,000                                   | 18,000                                   | 18,000                                   |
| Electron exposure<br>(e <sup>-</sup> /Å <sup>2</sup> ) | 53                                         | 53                                           | 53                                          | 59                                       | 59                                       | 59                                       |
| Pixel size (Å)                                         | 1.07                                       | 1.07                                         | 1.07                                        | 1.35                                     | 1.35                                     | 1.35                                     |
| Frames (no.)                                           | 32                                         | 32                                           | 32                                          | 36                                       | 36                                       | 36                                       |
| Defocus range<br>(μm)                                  | 1.8-2.8                                    | 1.8-2.8                                      | 1.8-2.8                                     | 2.5-3.5                                  | 2.5-3.5                                  | 2.5-3.5                                  |
| Symmetry<br>imposed                                    | C1                                         | C1                                           | C1                                          | C1                                       | C1                                       | C1                                       |
| Micrographs (no.)                                      | 2,818                                      | 2,818                                        | 2,818                                       | 4,724                                    | 4,724                                    | 4,724                                    |
| Initial particle<br>images (no.)                       | 815,439                                    | 815,439                                      | 815,439                                     | 876,212                                  | 876,212                                  | 876,212                                  |
| Final particle<br>images (no.)                         | 107,252                                    | 107,252                                      | 107,252                                     | 24,648                                   | 25,950                                   | 23,259                                   |
| Map resolution<br>(Å)                                  | 3.58                                       | 3.37                                         | 3.72                                        | 9.84                                     | 8.68                                     | 8.82                                     |
| FSC threshold                                          | 0.143                                      | 0.143                                        | 0.143                                       | 0.143                                    | 0.143                                    | 0.143                                    |
| <b>Model building</b>                                  |                                            |                                              |                                             |                                          |                                          |                                          |
| Software                                               | Coot                                       | Coot                                         | Coot                                        |                                          |                                          |                                          |
| <b>Refinement</b>                                      |                                            |                                              |                                             |                                          |                                          |                                          |
| Software                                               | Phenix                                     | Phenix                                       | Phenix                                      |                                          |                                          |                                          |
| <b>Model-map scores</b>                                |                                            |                                              |                                             |                                          |                                          |                                          |
| CC (mask)                                              | 0.83                                       | 0.82                                         | 0.82                                        |                                          |                                          |                                          |
| CC (box)                                               | 0.83                                       | 0.77                                         | 0.85                                        |                                          |                                          |                                          |
| CC (peaks)                                             | 0.76                                       | 0.71                                         | 0.76                                        |                                          |                                          |                                          |
| CC (volume)                                            | 0.82                                       | 0.81                                         | 0.81                                        |                                          |                                          |                                          |
| <b>Validation</b>                                      |                                            |                                              |                                             |                                          |                                          |                                          |
| <b>R.m.s deviations</b>                                |                                            |                                              |                                             |                                          |                                          |                                          |
| Bonds length<br>(Å)                                    | 0.010                                      | 0.005                                        | 0.009                                       |                                          |                                          |                                          |
| Bonds Angle<br>(°)                                     | 0.837                                      | 0.725                                        | 0.904                                       |                                          |                                          |                                          |
| <b>Ramachandran plot</b>                               |                                            |                                              |                                             |                                          |                                          |                                          |
| Favored (%)                                            | 95.37                                      | 92.39                                        | 91.17                                       |                                          |                                          |                                          |
| Allowed (%)                                            | 4.17                                       | 7.08                                         | 8.06                                        |                                          |                                          |                                          |
| Outlier (%)                                            | 0.46                                       | 0.53                                         | 0.77                                        |                                          |                                          |                                          |
